# Supplementary material for: Synthetic nucleic acid secondary structures containing the four stereoisomers of 1,4-bis(thymine-1-yl)butane-2,3-diol
Source: Royal Society of Chemistry journal article supplement (doi:10.1039/b713888a), 2007-11-07

---

## Synthetic nucleic acid secondary structures containing the four stereoisomers of 1,4-bis(thymine-1-yl)butane-2,3-diol

---

Mikkel S. Christensen,<sup>a</sup> Andrew Bond<sup>b</sup> and Poul Nielsen<sup>a\*</sup>

<sup>a</sup>Nucleic Acid Center, <sup>†</sup><sup>a,b</sup>Department of Physics and Chemistry, University of Southern Denmark, 5230 Odense M, Denmark. Fax: +45 66158780; Tel: +45 65502565; E-mail: pon@ifk.sdu.dk

### Electronic Supplementary Information (ESI)

**ESI-Figure 1 (a).** <sup>1</sup>H-NMR spectrum of compound **13** expanded in the region of the strongly coupled system. The 8 s spectrum was acquired on a 300 MHz Varian GEMINI in DMSO-*d*<sub>6</sub>.

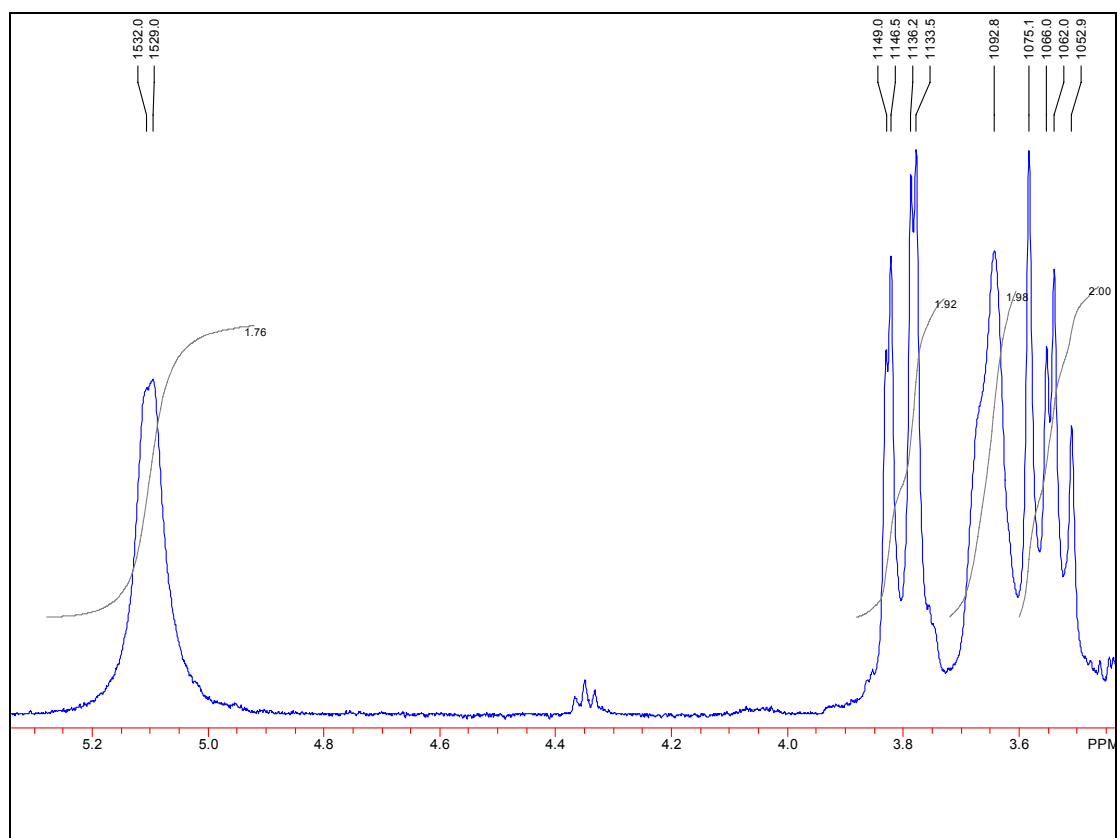

**ESI-Figure 1 (b).** 300 MHz simulated spectrum for the spin system {ABCXA'B'C'X'} in compound **13** with 3 Hz line width and  $J_{ab} = 13.0$  Hz,  $J_{ac} = 9.1$  Hz,  $J_{bc} = 2.6$  Hz,  $J_{cx} = 3$  Hz and  $J_{cc'} = 1-4$  Hz. The remaining coupling constants are assumed to be zero.

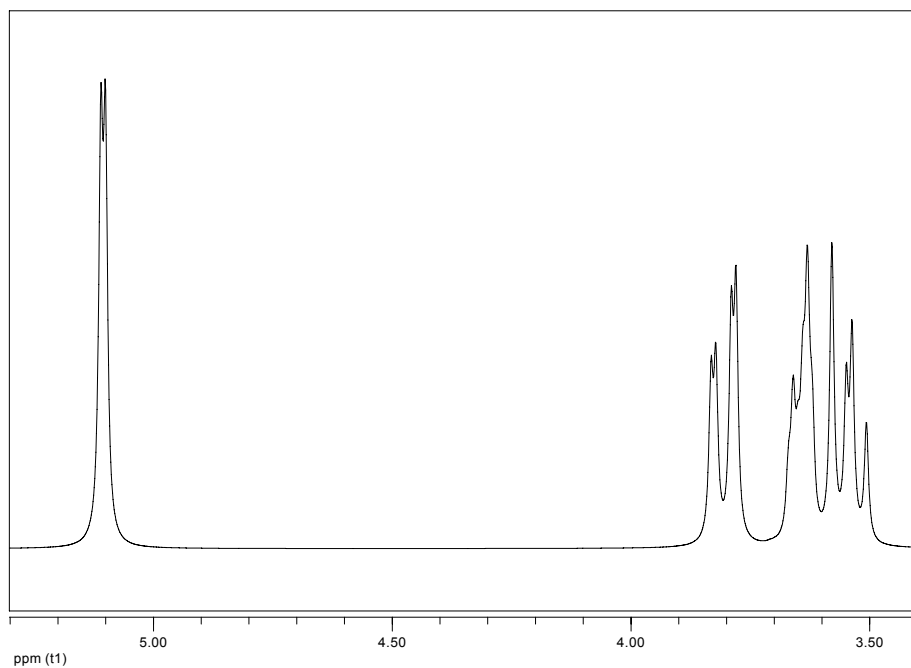

**ESI-Figure 1 (c).** <sup>1</sup>H-NMR spectrum of compound **14** expanded in the region of the strong coupled system. The 8 s spectrum was acquired on a 300 MHz Varian GEMINI in DMSO-*d*<sub>6</sub>.

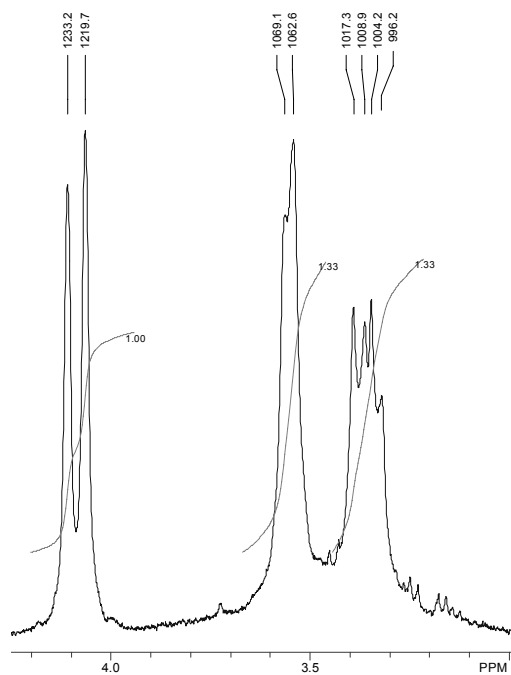

**ESI-Figure 2.**  $^{31}\text{P}$ -NMR study of the coupling kinetics with 1-*H*-tetrazole. The spectra were acquired on a 200 MHz Varian GEMINI using external reference and a sealed capillary tube inside the NMR tube with  $\text{DMSO-}d_6$  to provide a deuterium lock signal.

General description: To an NMR-tube with 20 mg (0.060 mmol) 3'-*O-tert*-butyldimethylsilyl-thymidine was added a 0.3 M solution of the phosphoramidite **8a** in MeCN (0.20 mL, 0.06 mmol), and the first spectrum of the amidite was acquired. Then a 0.45 M solution of 1-*H*-tetrazole in MeCN (0.20 mL, 0.090 mmol) was added to initiate the reaction. The first spectrum was acquired with 64 scans, which represents a time point approx. 5 min. after reaction start.

A) Coupling of double-headed D-threitol nucleoside with 1-*H*-tetrazole.

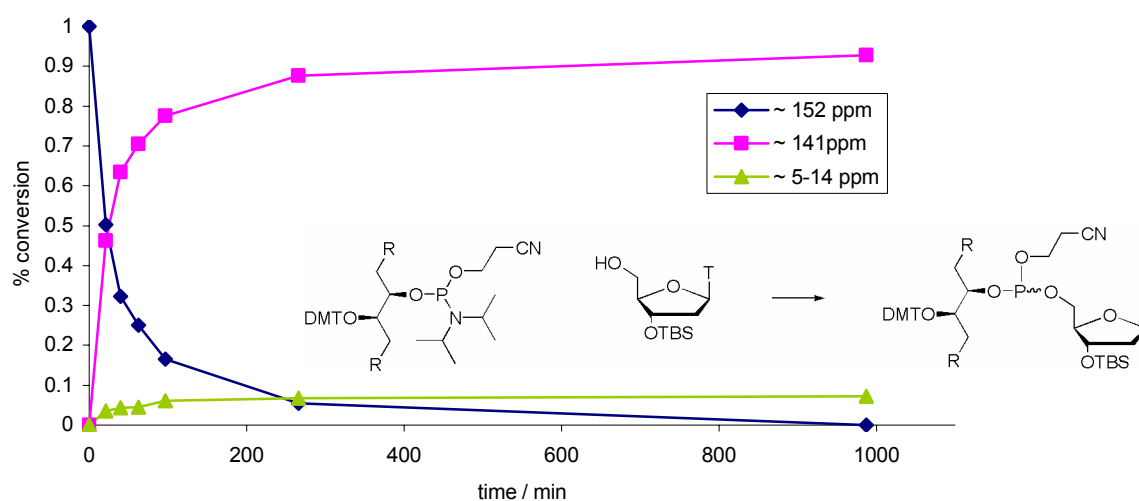

B) Coupling of ethylene glycol with 1-*H*-tetrazole.

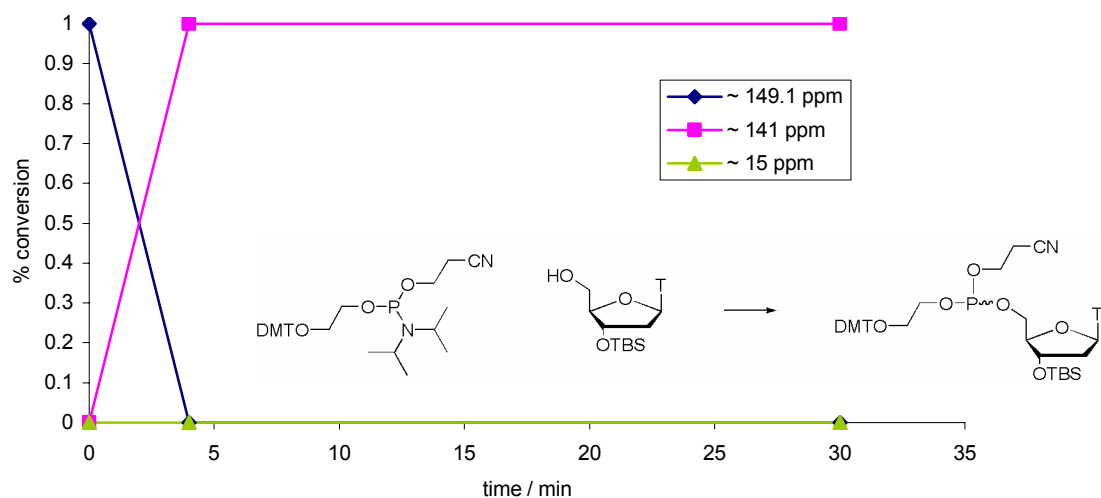

ESI-Figure 3 (a). Ion exchange chromatography and MALDI MS of small oligomers

**I) 5'-TTTT (m/z = 1154)**

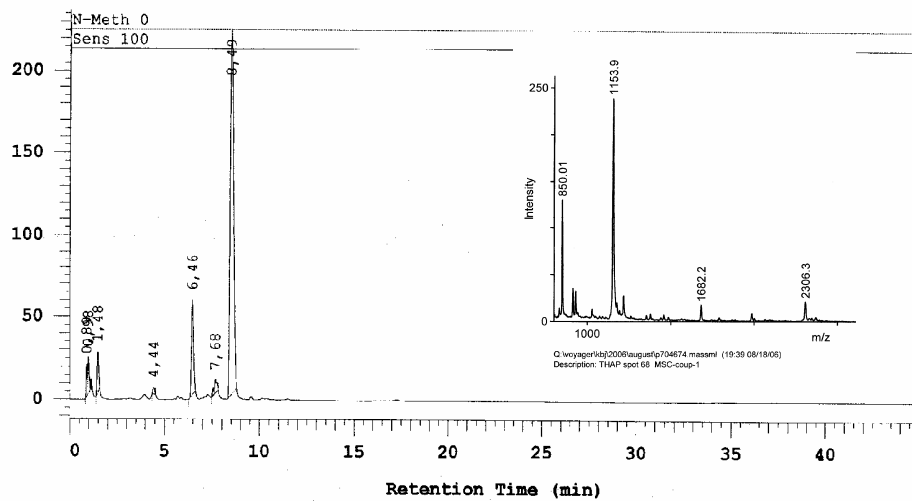

**II) 5'-TTXTT (m/z = 1554) activator: pyrHCl**

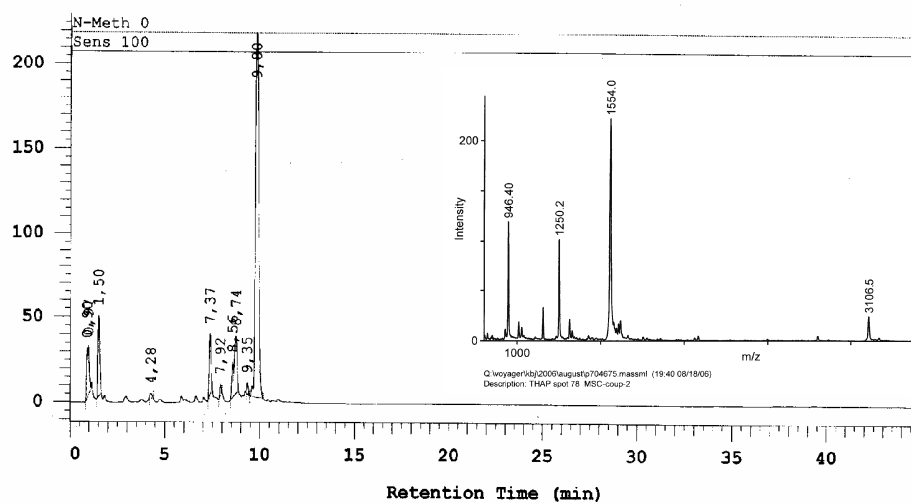

**III) 5'-TTXTT activator: 1H-tetrazole**

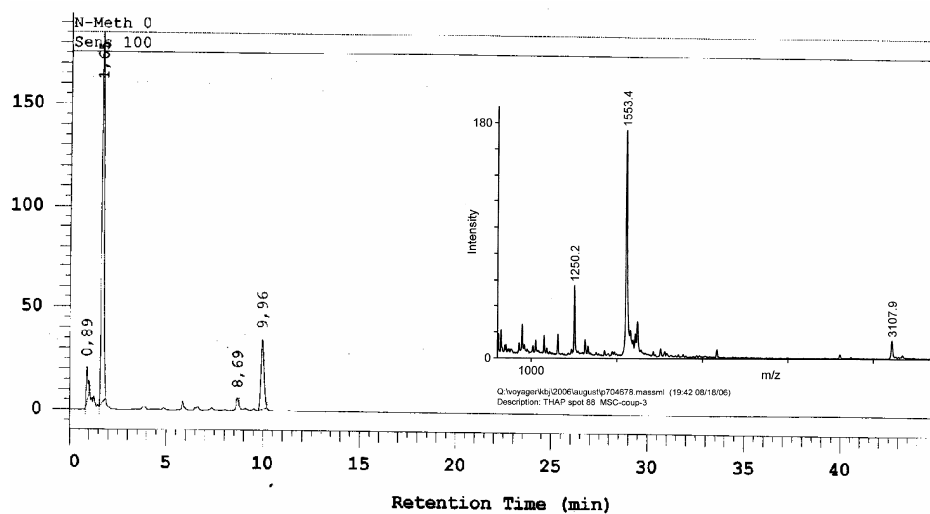

II spiked with I

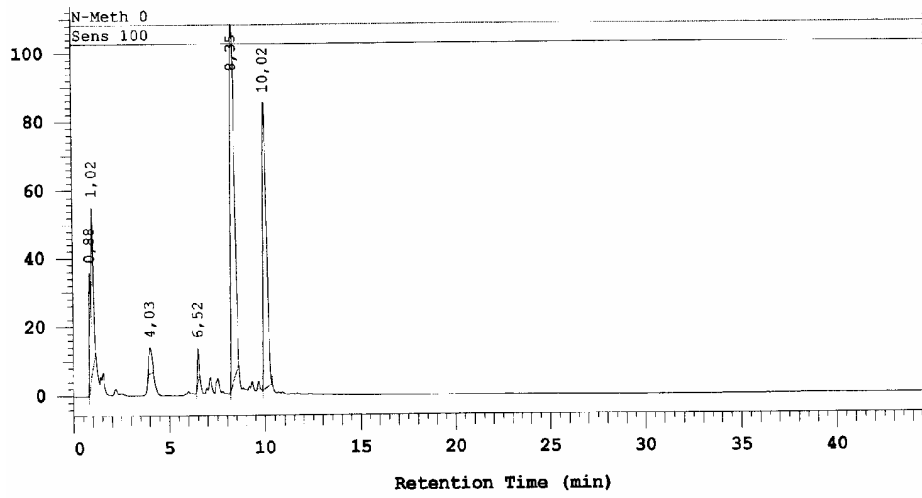

III spiked with I

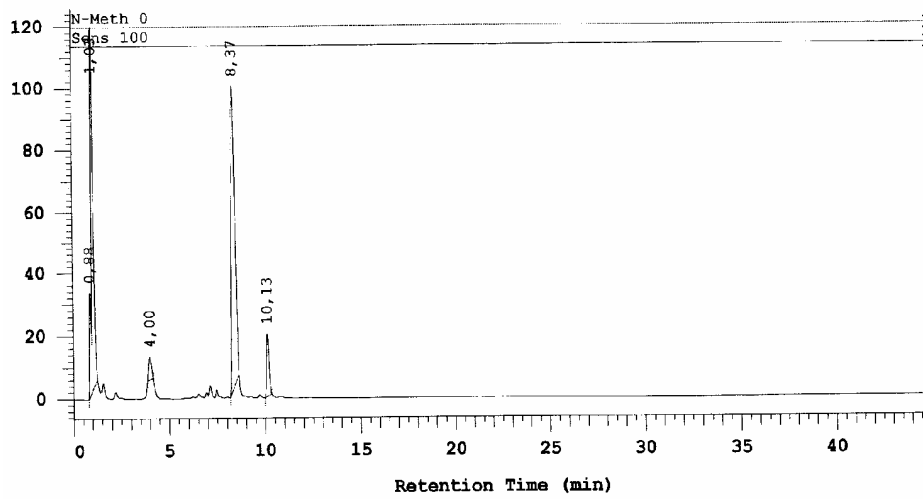

**ESI-Figure 4.**  $^{31}\text{P}$ -NMR study of the coupling sequence using pyrHCl. The 128 s spectra were acquired on a 200 MHz Varian GEMINI using external reference and a sealed capillary tube inside the NMR tube with  $\text{DMSO-}d_6$  to provide a deuterium lock signal.

In an NMR-tube, compound **8b** (0.16 g, 0.15 mmol) and 3'-*O*-*tert*-butyldimethylsilylthymidine (0.064 g, 0.18 mmol) was dissolved in MeCN (600  $\mu\text{L}$ ), and the first spectrum (**A**) of the amidite was acquired. Then a 0.5 M solution of pyrHCl in MeCN (0.43 mL, 0.22 mmol) was added and another spectrum (**B**) of the condensed phosphite product was acquired after 3 h. However, as shown in the figure (**D**), the reaction is complete after ca. 10 min. As a residue of amidite appeared in the spectrum the reaction was left for two days, but no further reaction was observed. Then, a 5.5 M solution of *tert*-butylhydrogenperoxide in decane (0.05 mL, 0.28 mmol) was added and a spectrum (**C**) was acquired after 3 h.

The following detritylation was monitored by  $^1\text{H}$ -NMR by dissolving the dinucleotide (47 mg) in  $\text{CD}_2\text{Cl}_2$  and recording a spectrum (**E**). Then a catalytic amount of trichloroacetic acid was added and the spectrum (**F**) was acquired after 10 min.

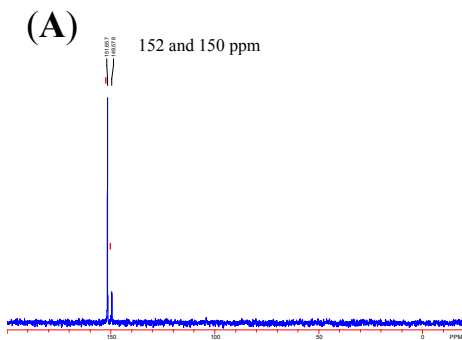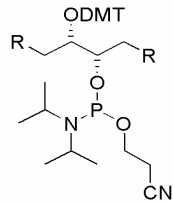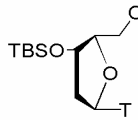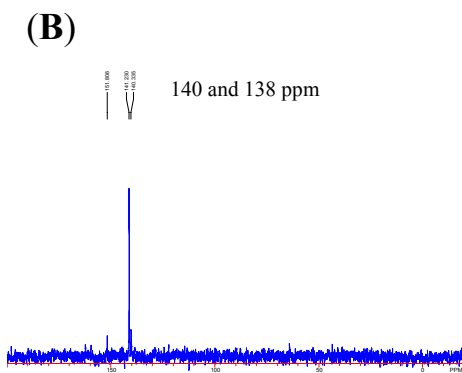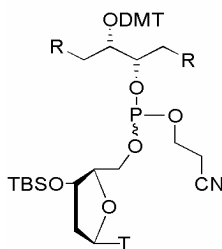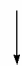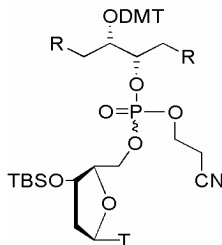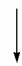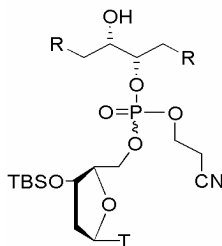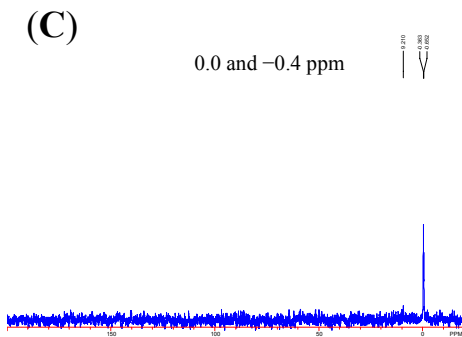

**(D)**

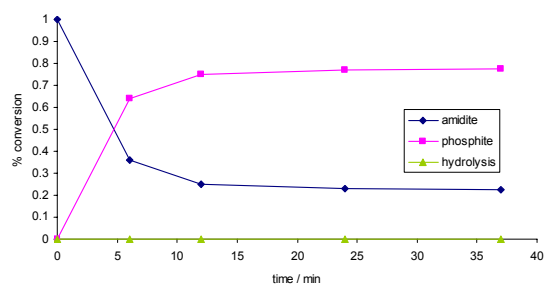

**(E)**

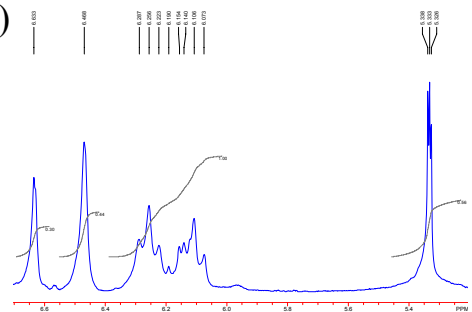

**(F)**

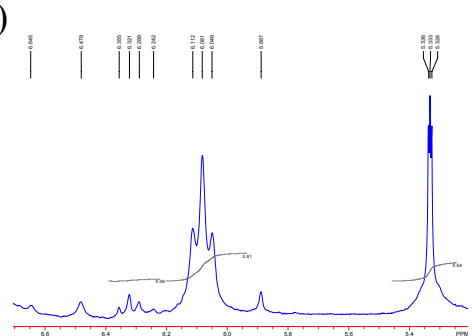

**ESI-Figure 5** (supporting Figure 5 in the paper).  $^{31}\text{P}$ -NMR study of the detritylation step using trichloroacetic acid in  $\text{CD}_2\text{Cl}_2$  at  $T = 24^\circ\text{C}$ .  $^{31}\text{P}$  NMR ( $t = 2$  h) and curve showing the development in the reaction mixture based on  $^{31}\text{P}$  NMR,  $\delta \sim 0$  corresponds to the detritylated product,  $\delta \sim 15$  to the cyclic phosphate and  $\delta \sim -1$  corresponds to hydrolysis of the cyclic phosphate.

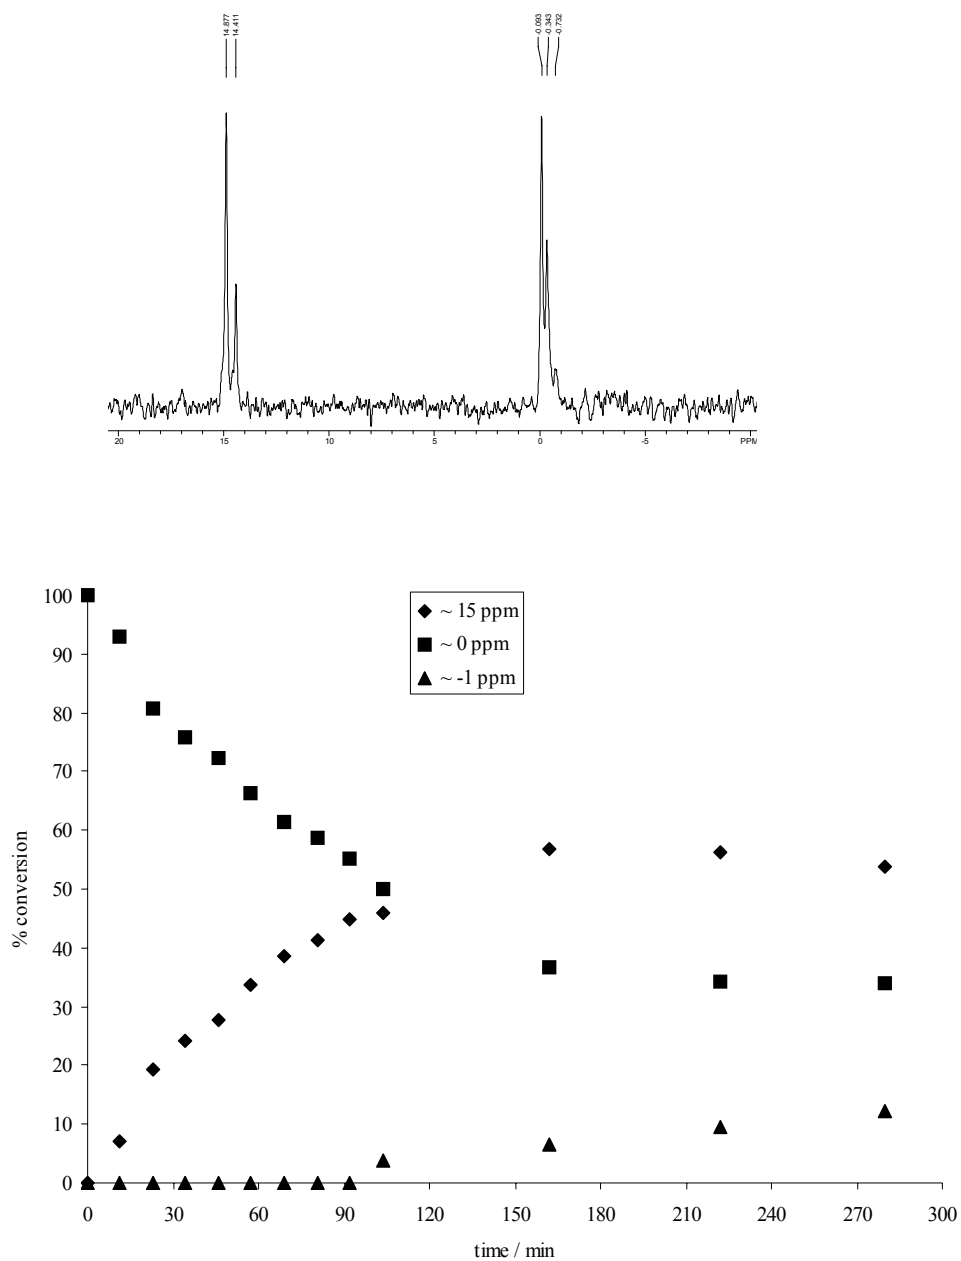

Supplement: b713888a.pdf [file b713888a.pdf]
